# Supplementary material for: Investigation of Drug Cocktail Effects on Cancer Cell-Spheroids Using a Microfluidic Drug-Screening Assay
Source: MDPI journal article supplement (doi:10.3390/mi8060167), 2017-05-24
Supplement: s1 [file s1]

# Supplementary Materials: Investigation of Drug Cocktail Effects on Cancer Cell-Spheroids Using a Microfluidic Drug-Screening Assay

Ka I. Au Ieong, Chengpeng Yang, Chin To Wong, Angelie C. Shui, Tom T. Y. Wu, Ting-Hsuan Chen and Raymond H. W. Lam

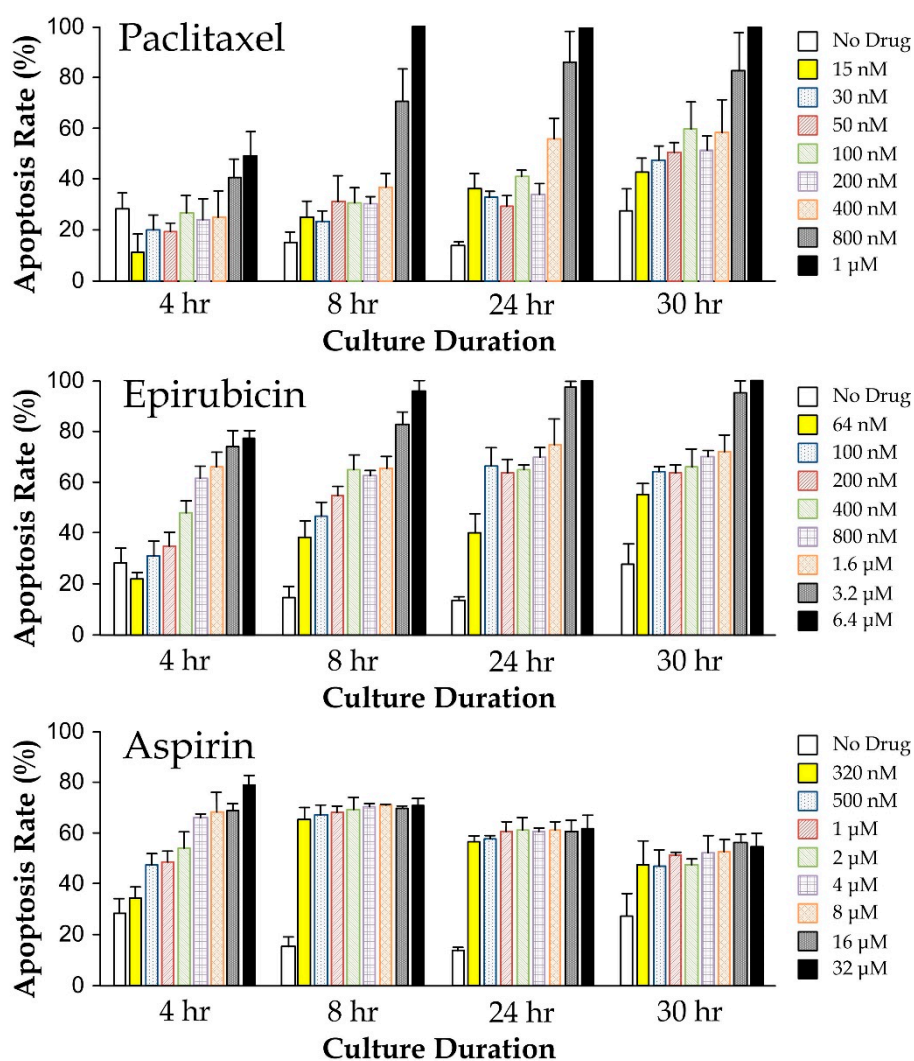

**Figure S1.** Apoptosis rates of cells cultured in well plates treated with different concentrations of paclitaxel, epirubicin and aspirin for 4 h, 8 h, 24 h and 30 h of culture durations.

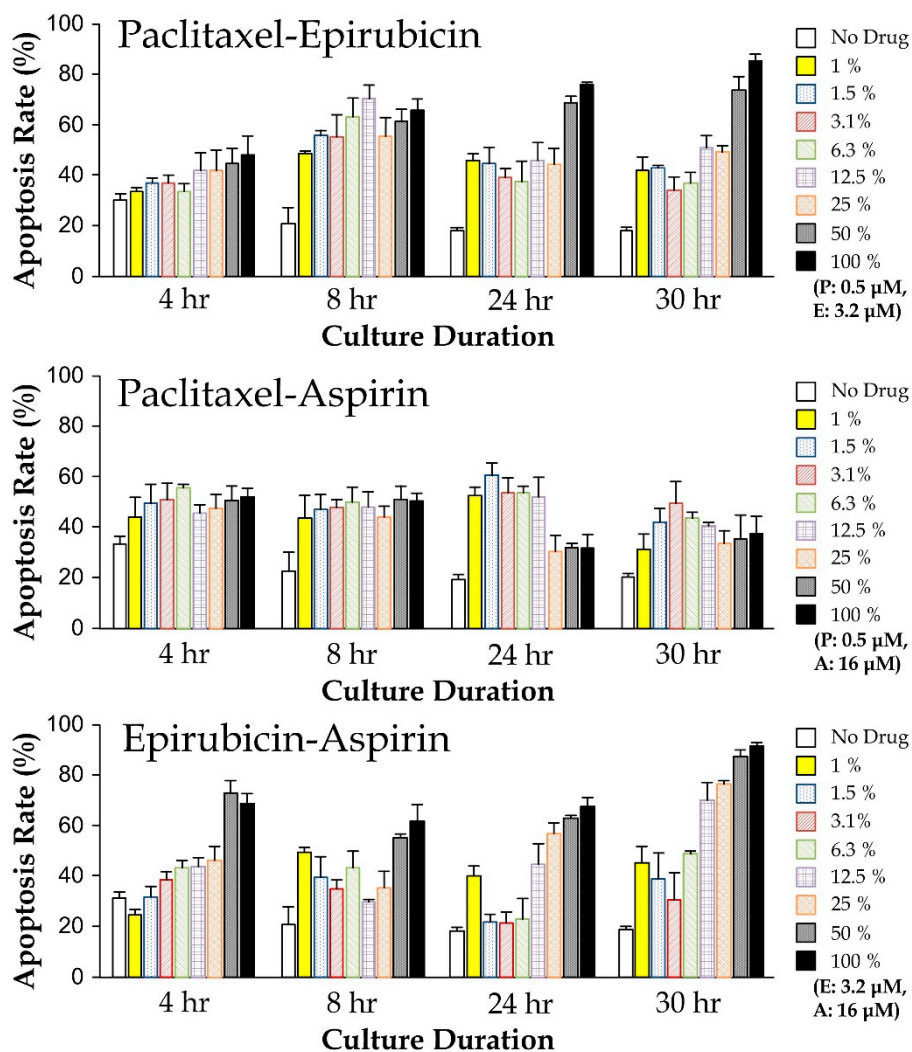

**Figure S2.** Apoptosis rates of cells cultured in well plates treated with different relative concentrations (0–100%) of paclitaxel-aspirin (PA), epirubicin-aspirin (EA) and paclitaxel-epirubicin (PE) mixtures and for 4 h, 8 h, 24 h and 30 h of culture durations.

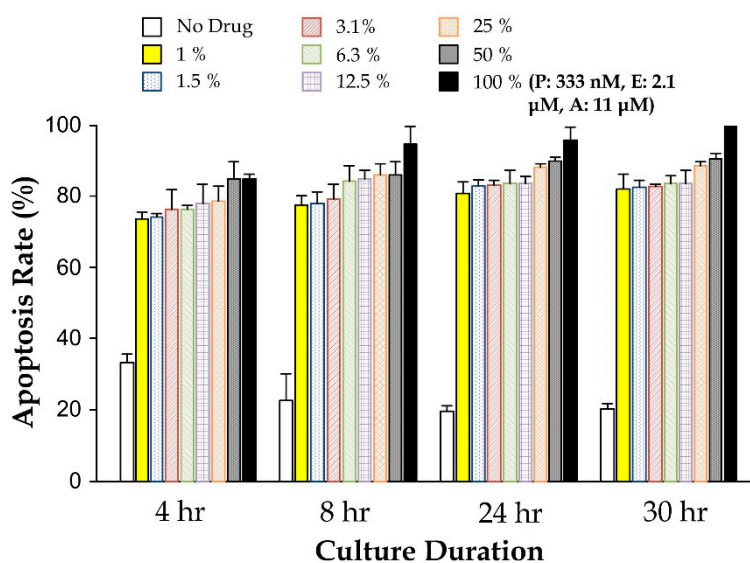

**Figure S3.** Apoptosis rates of cells cultured in well plates treated with different relative concentrations (0–100%) of a paclitaxel-epirubicin-aspirin (PEA) cocktail and for 4 h, 8 h, 24 h and 30 h of culture durations.
